# Supplementary material for: Bacillus coagulans in Combination with Chitooligosaccharides Regulates Gut Microbiota and Ameliorates the DSS-Induced Colitis in Mice
Source: PubMed Central journal article supplement (PMC9430726; doi:10.1128/spectrum.00641-22), 2022-07-28
Supplement: spectrum.00641-22-s0001.pdf [file spectrum.00641-22-s0001.pdf]

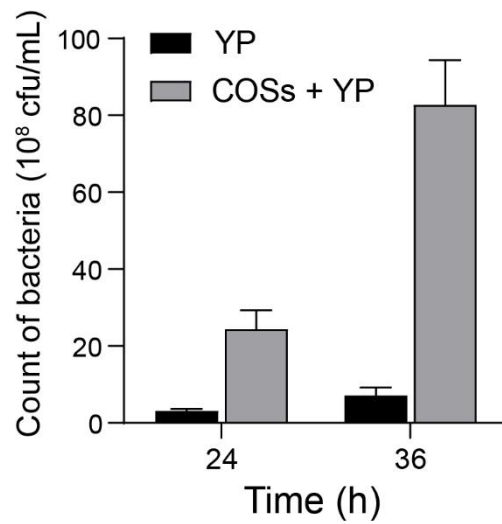

**Supplementary Figure 1. The count of bacteria of *B. coagulans* FCYS01 with COSs as carbon source. YP: Yeast extract 10 g /L and Tryptone 20 g /L; COSs +YP: COSs 10 g /L, Yeast extract 10 g /L and Tryptone 20 g /L.**

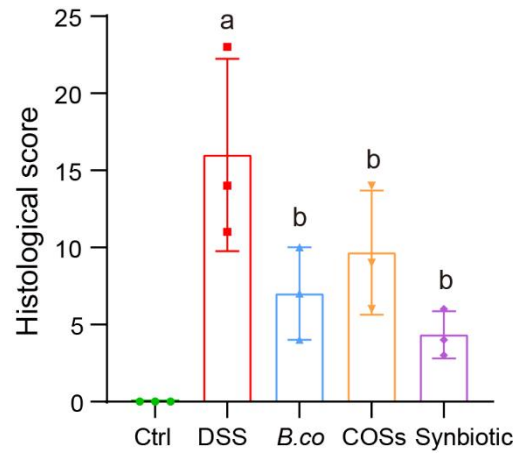

**Supplementary Figure 2. Histological score calculated after microscopic analyses of the colons used for immunohistochemical analysis.** Data were shown as means  $\pm$  SEM. Data with different superscript letters (a and b) were significantly different ( $p < 0.05$ ) according to one-way ANOVA followed by Tukey's test. Ctrl: healthy control; DSS: DSS-treated group; *B. co*, COSs and Synbiotic: supplementation of *B. coagulans* spores, COSs or spores + COSs, respectively.
